# Supplementary material
Source: PubMed Central journal article supplement (PMC2094283)
Supplement: thorax_thx.2006.076851_2.pdf [file thorax_thx.2006.076851_2.pdf]

**Supplementary Table 1.** % Excess relative risks (95% credible intervals) by cause and exposure window for joint models containing black smoke and sulphur dioxide, adjusted for deprivation and urban/rural classification.

| Exposure Window (years) <sup>a</sup> | All-cause          |                   | Cardio-respiratory |                   | Cardiovascular    |                   | Respiratory         |                     | Lung cancer        |                     | Other               |                   |
|--------------------------------------|--------------------|-------------------|--------------------|-------------------|-------------------|-------------------|---------------------|---------------------|--------------------|---------------------|---------------------|-------------------|
|                                      | BS                 | SO <sub>2</sub>   | BS                 | SO <sub>2</sub>   | BS                | SO <sub>2</sub>   | BS                  | SO <sub>2</sub>     | BS                 | SO <sub>2</sub>     | BS                  | SO <sub>2</sub>   |
| 0-4                                  | 0.1<br>(-0.3 ,0.5) | 4.5<br>(3.8 ,5.2) | 0.1<br>(-0.4 ,0.7) | 5.3<br>(4.4 ,6.2) | 0.4<br>(-0.2 ,1)  | 2.9<br>(1.9 ,3.9) | -0.7<br>(-1.7 ,0.4) | 13.9<br>(12 ,15.9)  | 1.1<br>(-0.4 ,2.6) | -0.4<br>(-2.8 ,2.3) | -0.1<br>(-0.9,0.5)  | 4.2<br>(3.1 ,5.5) |
| 5-8                                  | 0.2<br>(-0.1 ,0.5) | 4.5<br>(4 ,5)     | 0.5<br>(0.1 ,0.9)  | 4.3<br>(3.6 ,5)   | 0.5<br>(0.1 ,0.9) | 2.6<br>(1.9 ,3.4) | 0.4<br>(-0.4 ,1.2)  | 10.2<br>(8.8 ,11.7) | 0.9<br>(-0.2 ,2)   | 3.0<br>(1 ,4.9)     | -0.4<br>(-0.9,0.1)  | 5.2<br>(4.4 ,6.1) |
| 9-12                                 | 0.7<br>(0.5 ,0.9)  | 2.6<br>(2.3 ,3.1) | 1.1<br>(0.9 ,1.3)  | 2.3<br>(1.8 ,2.8) | 1.2<br>(1 ,1.5)   | 1.0<br>(0.5 ,1.6) | 0.7<br>(0.2 ,1.2)   | 6.7<br>(5.7 ,7.8)   | 1.7<br>(1.1 ,2.4)  | 1.7<br>(0.4 ,3.1)   | -0.1<br>(-0.4 ,0.2) | 3.5<br>(2.8 ,4.1) |
| 13-16                                | 0.7<br>(0.6,0.8)   | 1.6<br>(1.3 ,1.9) | 1.0<br>(0.9 ,1.2)  | 1.4<br>(1 ,1.8)   | 1.2<br>(1.1,1.4)  | 0.6<br>(0.1 ,1)   | 0.4<br>(0.1 ,0.7)   | 4.3<br>(3.5 ,5.1)   | 1.1<br>(0.7 ,1.5)  | 0.8<br>(-0.2 ,1.8)  | 0.0<br>(-0.2 ,0.2)  | 2.1<br>(1.6 ,2.6) |
| 0-8                                  | 0.0<br>(-0.2 ,0.2) | 2.6<br>(2.3 ,2.9) | 0.1<br>(-0.1 ,0.4) | 2.7<br>(2.3 ,3.1) | 0.2<br>(0 ,0.5)   | 1.6<br>(1.1 ,2)   | -0.2<br>(-0.7 ,0.3) | 6.7<br>(5.9 ,7.6)   | 0.5<br>(-0.2 ,1.3) | 1.0<br>(-0.1 ,2)    | -0.3<br>(-0.6 ,0)   | 2.9<br>(2.4 ,3.4) |
| 0-12                                 | 0.2<br>(0.1,0.3)   | 1.5<br>(1.3 ,1.7) | 0.3<br>(0.2 ,0.5)  | 1.4<br>(1.2 ,1.7) | 0.4<br>(0.3 ,0.6) | 0.7<br>(0.4 ,1)   | 0.1<br>(-0.2 ,0.3)  | 3.9<br>(3.4 ,4.4)   | 0.7<br>(0.3 ,1)    | 0.6<br>(0 ,1.3)     | -0.2<br>(-0.3 ,0)   | 1.8<br>(1.5 ,2.1) |
| 0-16                                 | 0.2<br>(0.2 ,0.3)  | 0.9<br>(0.8,1)    | 0.4<br>(0.3 ,0.4)  | 0.8<br>(0.6,0.9)  | 0.4<br>(0.4 ,0.5) | 0.3<br>(0.2 ,0.5) | 0.1<br>(-0.1 ,0.2)  | 2.4<br>(2 ,2.7)     | 0.5<br>(0.3 ,0.7)  | 0.4<br>(-0.1 ,0.8)  | -0.1<br>(-0.2 ,0)   | 1.1<br>(0.9 ,1.3) |

BS black smoke

SO<sub>2</sub> sulphur dioxide

<sup>a</sup> See Figure 1.

Excess risks are per 10µg/m<sup>3</sup> BS and per 10ppb SO<sub>2</sub>
